# Supplementary material for: Period 2 Suppresses the Malignant Cellular Behaviors of Colorectal Cancer Through the Epithelial-Mesenchymal Transformation Process
Source: PubMed Central journal article supplement — Cancer Control. 2022 Feb 26;29:10732748221081369. doi: 10.1177/10732748221081369 (PMC8891940; doi:10.1177/10732748221081369), 2022-02-26

Figure S1 Informations of immunohistochemical cases and Kaplan-Meier survival analysis of PER2

A

| Case          | Pos. | No. | Age | Sex | Organ/Anatomic Site | Pathology diagnosis          | TNM    | Grade | Stage | Type      |
|---------------|------|-----|-----|-----|---------------------|------------------------------|--------|-------|-------|-----------|
| Normal tissue | B10  | 28  | 38  | M   | Colon               | Adjacent normal colon tissue | -      | -     | -     | NAT       |
| Case 1        | A13  | 13  | 55  | M   | Colon               | Adenocarcinoma               | T3N0M0 | 3     | IIA   | Malignant |
| Case2         | A17  | 17  | 34  | M   | Colon               | Adenocarcinoma               | T3N0M0 | 2     | IIA   | Malignant |
| Case3         | I5   | 149 | 77  | M   | Colon               | Adenocarcinoma               | T3N1M0 | 3     | IIIB  | Malignant |
| Case4         | F7   | 97  | 56  | F   | Colon               | Adenocarcinoma               | T2N1M0 | 3     | IIIA  | Malignant |

B

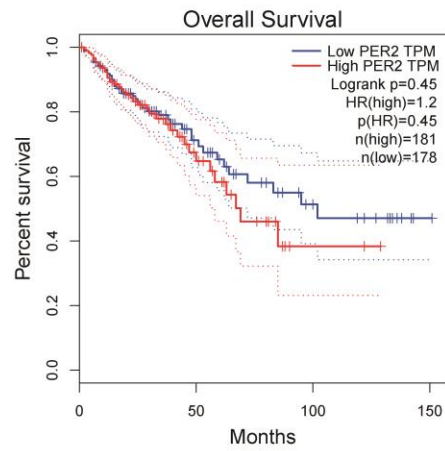

Supplement: sj-pdf-1-ccx-10.1177_10732748221081369.pdf [file sj-pdf-1-ccx-10.1177_10732748221081369.pdf]
