# Supplementary figures and images for: Period 2 Suppresses the Malignant Cellular Behaviors of Colorectal Cancer Through the Epithelial-Mesenchymal Transformation Process
Source: PubMed Central journal article supplement — Cancer Control. 2022 Feb 26;29:10732748221081369. doi: 10.1177/10732748221081369 (PMC8891940; doi:10.1177/10732748221081369), 2022-02-26

Figure S2 Effects of overexpression of PER2 on migration and proliferation of LOVO cells

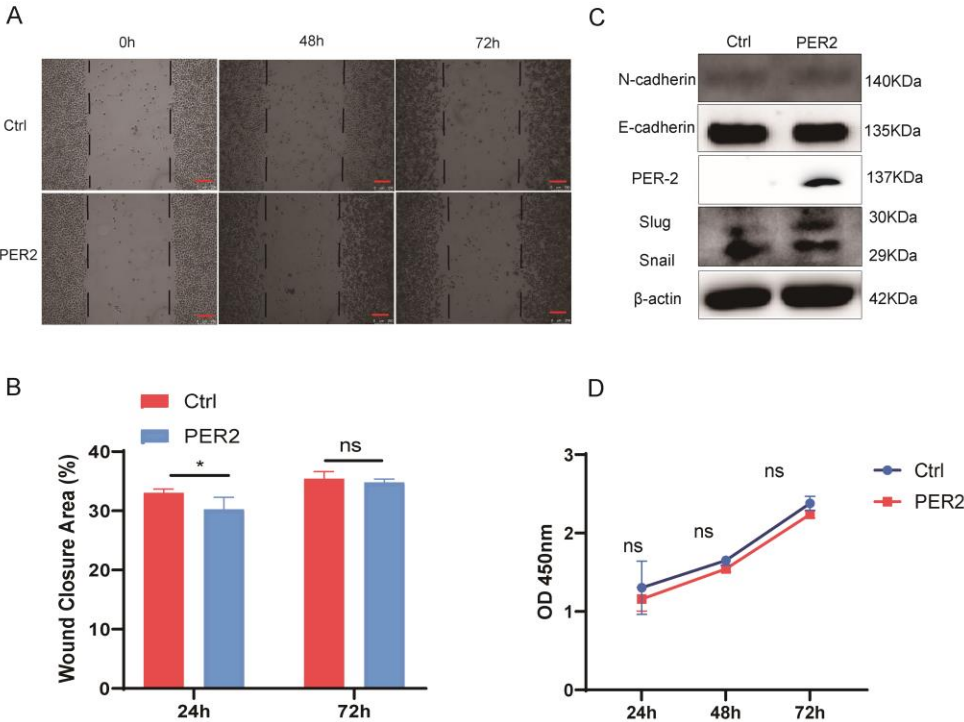

Supplement: sj-pdf-2-ccx-10.1177_10732748221081369.pdf [file sj-pdf-2-ccx-10.1177_10732748221081369.pdf]
